# Supplementary material for: Risk factors for the deterioration of periventricular–intraventricular hemorrhage in preterm infants
Source: PubMed Central journal article supplement (PMC7423930; doi:10.1038/s41598-020-70603-z), 2020-08-12
Supplement: 41598_2020_70603_MOESM1_ESM.pdf [file 41598_2020_70603_MOESM1_ESM.pdf]

# **Risk factors for the deterioration of periventricular-intraventricular hemorrhage in preterm infants**

Tian Wu, MD<sup>a,b</sup>, Yan Wang, MD<sup>a,b</sup>, Tao Xiong, MD, PhD<sup>a,b,c,\*</sup>, Sheng Huang, MSE<sup>d</sup>,  
Tian Tian MS<sup>e</sup>, Jun Tang, MD, PhD<sup>a,b</sup>, Dezhi Mu, MD, PhD<sup>a,b</sup>

<sup>a</sup> *Department of Pediatrics, West China Second University Hospital, Sichuan University, Chengdu, China*

<sup>b</sup> *Key Laboratory of Birth Defects and Related Diseases of Women and Children (Sichuan University), Ministry of Education, Chengdu, China*

<sup>c</sup> *Deep Underground Space Medical Center, West China Hospital, Sichuan University, Chengdu, Sichuan, China*

<sup>d</sup> *Department of information management, West China Second University Hospital, Sichuan University, Chengdu, Sichuan, China*

<sup>e</sup> *Institute of Reproductive and Child Health, Department of Epidemiology & Biostatistics, School of Public Health, Peking University Health Science Center, Beijing, China*

TW and YW contributed equally to this work.

\*Correspondence: Tao Xiong, No. 20, Section Three, South Renmin Road, Chengdu, Sichuan 160041, China (e-mail: [tao\\_xiong@126.com](mailto:tao_xiong@126.com)).

The authors report no conflicts of interest.

**Supplementary Table 1.** The PV-IVH deterioration in different gestational groups [% (n)].

|                                               | <b>&lt; 28 weeks</b> | <b>28~30 weeks</b> | <b>30~32 weeks</b> | <b>32~37 weeks</b> |
|-----------------------------------------------|----------------------|--------------------|--------------------|--------------------|
|                                               | <b>n=495</b>         | <b>n=1,558</b>     | <b>n=4,044</b>     | <b>n=18,179</b>    |
| PV-IVH, % (n)                                 | 55.6 (275)           | 40.1 (625)         | 28.1 (1,133)       | 9.6 (1,750)        |
| PV-IVH deterioration, % (n)                   | 2.4 (12)             | 1.6 (25)           | 0.19 (8)           | N                  |
| PV-IVH deterioration within first week, % (n) | 2.4 (12)             | 1.6 (25)           | 0.12 (5)           | N                  |

PV-IVH: periventricular - intraventricular hemorrhage

**Supplementary Table 2.** Correlation analysis.

|                                    |   | GA       | BW       | Intrauterine<br>infection | Asphyxia | Primiparity | Invasive<br>respiratory<br>support | PS       | Dopamine | Lower<br>genital<br>tract<br>infection | Antibiotics |
|------------------------------------|---|----------|----------|---------------------------|----------|-------------|------------------------------------|----------|----------|----------------------------------------|-------------|
| GA                                 | r | 1.000    | 0.625**  | -0.152**                  | -0.196** | 0.013       | -0.363**                           | -0.156** | -0.229** | -0.166**                               | 0.134**     |
|                                    | p |          | 0.000    | 0.001                     | 0.000    | 0.769       | 0.000                              | 0.000    | 0.000    | 0.000                                  | 0.002       |
| BW                                 | r | 0.625**  | 1.000    | -0.197**                  | -0.158** | 0.066       | -0.488**                           | -0.187** | -0.366** | -0.303**                               | 0.171**     |
|                                    | p | 0.000    |          | 0.000                     | 0.000    | 0.132       | 0.000                              | 0.000    | 0.000    | 0.000                                  | 0.000       |
| Intrauterine<br>infection          | r | -0.152** | -0.197** | 1.000                     | -0.022   | -0.015      | 0.196**                            | 0.122**  | 0.197**  | 0.434**                                | -0.261**    |
|                                    | p | 0.001    | 0.000    |                           | 0.623    | 0.738       | 0.000                              | 0.006    | 0.000    | 0.000                                  | 0.000       |
| Asphyxia                           | r | -0.196** | -0.158** | -0.022                    | 1.000    | -0.073      | 0.076                              | 0.020    | 0.175**  | -0.012                                 | -0.044      |
|                                    | p | 0.000    | 0.000    | 0.623                     |          | 0.098       | 0.086                              | 0.653    | 0.000    | 0.779                                  | 0.319       |
| Primiparity                        | r | 0.013    | 0.066    | -0.015                    | -0.073   | 1.000       | -0.096*                            | -0.032   | -0.082   | -0.096*                                | 0.075       |
|                                    | p | 0.769    | 0.132    | 0.738                     | 0.098    |             | 0.029                              | 0.472    | 0.065    | 0.030                                  | 0.088       |
| Invasive<br>respiratory<br>support | r | -0.363** | -0.488** | 0.196**                   | 0.076    | -0.096*     | 1.000                              | 0.110*   | 0.300**  | 0.353**                                | -0.200**    |
|                                    | p | 0.000    | 0.000    | 0.000                     | 0.086    | 0.029       |                                    | 0.012    | 0.000    | 0.000                                  | 0.000       |

|                               |   |          |          |          |         |         |          |         |          |          |          |
|-------------------------------|---|----------|----------|----------|---------|---------|----------|---------|----------|----------|----------|
| PS                            | r | -0.156** | -0.187** | 0.122**  | 0.020   | -0.032  | 0.110*   | 1.000   | 0.295**  | 0.244**  | -0.099*  |
|                               | p | 0.000    | 0.000    | 0.006    | 0.653   | 0.472   | 0.012    |         | 0.000    | 0.000    | 0.025    |
| Dopamine                      | r | -0.229** | -0.366** | 0.197**  | 0.175** | -0.082  | 0.300**  | 0.295** | 1.000    | 0.511**  | -0.304** |
|                               | p | 0.000    | 0.000    | 0.000    | 0.000   | 0.065   | 0.000    | 0.000   |          | 0.000    | 0.000    |
| Lower genital tract infection | r | -0.166** | -0.303** | 0.434**  | -0.012  | -0.096* | 0.353**  | 0.244** | 0.511**  | 1.000    | -0.506** |
|                               | p | 0.000    | 0.000    | 0.000    | 0.779   | 0.030   | 0.000    | 0.000   | 0.000    |          | 0.000    |
| Antibiotics                   | r | 0.134**  | 0.171**  | -0.261** | -0.044  | 0.075   | -0.200** | -0.099* | -0.304** | -0.506** | 1.000    |
|                               | p | 0.002    | 0.000    | 0.000    | 0.319   | 0.088   | 0.000    | 0.025   | 0.000    | 0.000    |          |

\* P < 0.05 between the two variables.

\*\* P < 0.01 between the two variables.

GA: gestational age; BW: birth weight; PS: pulmonary surfactant.

**Supplementary Table 3.** Stepwise regression.

|        | <b>Variables</b>              | <b><math>\beta</math></b> | <b>SE</b> | <b>Wals</b> | <b>P</b> | <b>OR</b> | <b>95%CI</b> |      |
|--------|-------------------------------|---------------------------|-----------|-------------|----------|-----------|--------------|------|
| Step 1 | BW                            | -0.001                    | 0.001     | 2.125       | 0.14     | 1.00      | 1.00         | 1.00 |
|        | Intrauterine infection        | -0.124                    | 0.398     | 0.098       | 0.75     | 0.88      | 0.41         | 1.93 |
|        | Asphyxia                      | 0.567                     | 0.375     | 2.293       | 0.13     | 1.76      | 0.85         | 3.68 |
|        | Primarity                     | -0.290                    | 0.358     | 0.655       | 0.42     | 0.75      | 0.37         | 1.51 |
|        | Invasive respiratory support  | 0.183                     | 0.397     | 0.213       | 0.64     | 1.20      | 0.55         | 2.62 |
|        | PS                            | 0.366                     | 0.394     | 0.863       | 0.35     | 1.44      | 0.67         | 3.12 |
|        | Dopamine                      | 0.053                     | 0.439     | 0.015       | 0.90     | 1.05      | 0.45         | 2.49 |
|        | Antibiotics                   | -0.470                    | 0.728     | 0.416       | 0.52     | 0.63      | 0.15         | 2.60 |
|        | Lower genital tract infection | 0.776                     | 0.743     | 1.091       | 0.30     | 2.17      | 0.51         | 9.33 |
|        | GA                            | -0.467                    | 0.139     | 11.343      | 0.00     | 0.63      | 0.48         | 0.82 |
| Step 2 | BW                            | -0.001                    | 0.001     | 2.178       | 0.14     | 1.00      | 1.00         | 1.00 |
|        | Asphyxia                      | -0.129                    | 0.396     | 0.106       | 0.74     | 0.88      | 0.40         | 1.91 |
|        | Primarity                     | 0.579                     | 0.363     | 2.541       | 0.11     | 1.78      | 0.88         | 3.64 |
|        | Invasive respiratory support  | -0.290                    | 0.358     | 0.658       | 0.42     | 0.75      | 0.37         | 1.51 |
|        | PS                            | 0.185                     | 0.397     | 0.217       | 0.64     | 1.20      | 0.55         | 2.62 |

|        |                               |        |       |        |      |      |      |      |
|--------|-------------------------------|--------|-------|--------|------|------|------|------|
|        | Dopamine                      | 0.374  | 0.388 | 0.932  | 0.33 | 1.45 | 0.68 | 3.11 |
|        | Antibiotics                   | -0.475 | 0.724 | 0.431  | 0.51 | 0.62 | 0.15 | 2.57 |
|        | Lower genital tract infection | 0.802  | 0.710 | 1.278  | 0.26 | 2.23 | 0.56 | 8.96 |
|        | GA                            | -0.468 | 0.139 | 11.388 | 0.00 | 0.63 | 0.48 | 0.82 |
| Step 3 | BW                            | -0.001 | 0.001 | 2.197  | 0.14 | 1.00 | 1.00 | 1.00 |
|        | Asphyxia                      | 0.585  | 0.363 | 2.606  | 0.11 | 1.80 | 0.88 | 3.66 |
|        | Primarity                     | -0.302 | 0.356 | 0.718  | 0.40 | 0.74 | 0.37 | 1.49 |
|        | Invasive respiratory support  | 0.184  | 0.396 | 0.216  | 0.64 | 1.20 | 0.55 | 2.62 |
|        | PS                            | 0.373  | 0.387 | 0.926  | 0.34 | 1.45 | 0.68 | 3.10 |
|        | Antibiotics                   | -0.456 | 0.728 | 0.393  | 0.53 | 0.63 | 0.15 | 2.64 |
|        | Lower genital tract infection | 0.766  | 0.707 | 1.175  | 0.28 | 2.15 | 0.54 | 8.61 |
|        | GA                            | -0.464 | 0.138 | 11.370 | 0.00 | 0.63 | 0.48 | 0.82 |
| Step 4 | BW                            | -0.001 | 0.001 | 2.788  | 0.09 | 1.00 | 1.00 | 1.00 |
|        | Asphyxia                      | 0.584  | 0.363 | 2.590  | 0.11 | 1.79 | 0.88 | 3.65 |
|        | Primarity                     | -0.307 | 0.356 | 0.746  | 0.39 | 0.74 | 0.37 | 1.48 |
|        | Invasive respiratory support  | 0.347  | 0.383 | 0.822  | 0.36 | 1.42 | 0.67 | 3.00 |
|        | PS                            | -0.482 | 0.721 | 0.446  | 0.50 | 0.62 | 0.15 | 2.54 |

|        |                               |        |       |        |      |      |      |      |
|--------|-------------------------------|--------|-------|--------|------|------|------|------|
|        | Lower genital tract infection | 0.810  | 0.697 | 1.349  | 0.25 | 2.25 | 0.57 | 8.81 |
|        | GA                            | -0.467 | 0.137 | 11.590 | 0.00 | 0.63 | 0.48 | 0.82 |
| Step 5 | BW                            | -0.002 | 0.001 | 2.910  | 0.09 | 1.00 | 1.00 | 1.00 |
|        | Asphyxia                      | 0.591  | 0.362 | 2.661  | 0.10 | 1.81 | 0.89 | 3.67 |
|        | Primarity                     | -0.345 | 0.351 | 0.964  | 0.33 | 0.71 | 0.36 | 1.41 |
|        | PS                            | 0.352  | 0.383 | 0.845  | 0.36 | 1.42 | 0.67 | 3.01 |
|        | Lower genital tract infection | 1.201  | 0.394 | 9.318  | 0.00 | 3.33 | 1.54 | 7.19 |
|        | GA                            | -0.459 | 0.136 | 11.326 | 0.00 | 0.63 | 0.48 | 0.83 |
| Step 6 | BW                            | -0.002 | 0.001 | 3.068  | 0.08 | 1.00 | 1.00 | 1.00 |
|        | Asphyxia                      | 0.546  | 0.360 | 2.302  | 0.13 | 1.73 | 0.85 | 3.49 |
|        | Primarity                     | -0.342 | 0.351 | 0.947  | 0.33 | 0.71 | 0.36 | 1.41 |
|        | Lower genital tract infection | 1.262  | 0.388 | 10.585 | 0.00 | 3.53 | 1.65 | 7.56 |
|        | GA                            | -0.463 | 0.137 | 11.410 | 0.00 | 0.63 | 0.48 | 0.82 |
| Step 7 | BW                            | -0.002 | 0.001 | 3.162  | 0.08 | 1.00 | 1.00 | 1.00 |
|        | Asphyxia                      | 0.545  | 0.360 | 2.297  | 0.13 | 1.72 | 0.85 | 3.49 |
|        | Lower genital tract infection | 1.300  | 0.386 | 11.337 | 0.00 | 3.67 | 1.72 | 7.82 |
|        | GA                            | -0.465 | 0.136 | 11.623 | 0.00 | 0.63 | 0.48 | 0.82 |

|        |                               |        |       |        |      |      |      |      |
|--------|-------------------------------|--------|-------|--------|------|------|------|------|
| Step 8 | BW                            | -0.002 | 0.001 | 4.296  | 0.05 | 0.99 | 0.99 | 1.00 |
|        | Lower genital tract infection | 1.315  | 0.387 | 11.566 | 0.00 | 3.73 | 1.75 | 7.95 |
|        | GA                            | -0.483 | 0.134 | 12.948 | 0.00 | 0.62 | 0.48 | 0.80 |

GA: gestational age; BW: birth weight; PS: Pulmonary surfactant.



**Supplementary Table 4.** Collinearity analysis – VIF.

| <b>Model</b>                  | <b>Standardized Coefficients</b> |          |          | <b>Collinearity Statistics</b> |            |
|-------------------------------|----------------------------------|----------|----------|--------------------------------|------------|
|                               | <b><math>\beta</math></b>        | <b>t</b> | <b>P</b> | <b>Tolerance</b>               | <b>VIF</b> |
| Constant                      | --                               | 5.324    | 0.00     | --                             | --         |
| Birth weight                  | -0.067                           | -1.225   | 0.22     | 0.59                           | 1.70       |
| Gestational age               | -0.221                           | -4.204   | 0.00     | 0.64                           | 1.57       |
| Lower genital tract infection | 0.132                            | 2.990    | 0.00     | 0.90                           | 1.12       |

VIF less than 10 indicates no collinearity.

**Supplementary Table 5.** Demographic features of preterm infants with mild PV-IVH deterioration and severe PV-IVH deterioration.

| <b>Variables</b>                             | <b>Severe<br/>Deterioration<br/>n=5</b> | <b>Mild<br/>Deterioration<br/>n=37</b> | <b>P</b>    |
|----------------------------------------------|-----------------------------------------|----------------------------------------|-------------|
| Gestational age (weeks, mean±SD)             | 29.7±1.6                                | 28.3±1.6                               | <b>0.04</b> |
| Birth weight (gram, mean±SD)                 | 1256.7±398.9                            | 1113.1±209.3                           | 0.18        |
| Male (n, %)                                  | 3 (60.0)                                | 18 (48.6)                              | >0.99       |
| History of fetal abnormalities (n, %)        | 1 (20.0)                                | 6 (16.2)                               | >0.99       |
| Primigravidity (n, %)                        | 4 (80.0)                                | 26 (70.2)                              | >0.99       |
| Primiparity (n, %)                           | 4 (80.0)                                | 14 (37.8)                              | 0.23        |
| Multiple gestations (n, %)                   | 0 (0)                                   | 19 (51.4)                              | 0.05        |
| Vaginal delivery (n, %)                      | 3 (60.0)                                | 26 (70.3)                              | 0.64        |
| In vitro fertilization (n, %)                | 0 (0)                                   | 2 (5.4)                                | >0.99       |
| Gestational hypertension (n, %)              | 0 (0)                                   | 5 (13.5)                               | >0.99       |
| Intrauterine infection (n, %)                | 2 (40.0)                                | 13 (35.1)                              | >0.99       |
| Premature rupture of membranes (n, %)        | 1 (20.0)                                | 7 (18.9)                               | >0.99       |
| Placental abnormality (n, %)                 | 2 (40.0)                                | 9 (24.3)                               | 0.59        |
| Intrahepatic cholestasis of pregnancy (n, %) | 1 (20.0)                                | 8 (88.9)                               | >0.99       |

|                                       |          |           |       |
|---------------------------------------|----------|-----------|-------|
| Anemia (n, %)                         | 2 (14.0) | 13 (35.1) | >0.99 |
| Lower genital tract infections (n, %) | 4 (80.0) | 26 (70.3) | >0.99 |
| Amniotic fluid contamination (n, %)   | 1 (20.0) | 6 (16.2)  | >0.99 |
| Fetal intrauterine distress (n, %)    | 2 (40.0) | 6 (16.2)  | 0.24  |

---

PV-IVH: periventricular - intraventricular hemorrhage

**Supplementary Table 6.** Complications of preterm infants with mild PV-IVH deterioration and severe PV-IVH deterioration.

| <b>Variables</b>                     | <b>Severe<br/>Deterioration<br/>n=5</b> | <b>Mild<br/>Deterioration<br/>n=37</b> | <b>P</b> |
|--------------------------------------|-----------------------------------------|----------------------------------------|----------|
| Asphyxia (n, %)                      | 4 (80.0)                                | 21 (56.8)                              | 0.63     |
| Pneumonia (n, %)                     | 4 (80.0)                                | 31 (83.8)                              | >0.99    |
| Respiratory distress syndrome (n, %) | 3 (60.0)                                | 22 (59.5)                              | >0.99    |
| Apnea (n, %)                         | 3 (60.0)                                | 16 (43.2)                              | 0.64     |
| Patent ductus arteriosus (n, %)      | 1 (20.0)                                | 9 (24.3)                               | >0.99    |
| Scleredema (n, %)                    | 1 (20.0)                                | 6 (16.2)                               | >0.99    |
| Anemia (n, %)                        | 2 (40.0)                                | 20 (54.1)                              | 0.66     |
| Sepsis (n, %)                        | 0 (0.0)                                 | 6 (16.2)                               | >0.99    |

PV-IVH: periventricular - intraventricular hemorrhage

**Supplementary Table 7.** Laboratory test and treatment in preterm infants with mild PV-IVH deterioration and severe PV-IVH deterioration.

| <b>Variables</b>                          | <b>Severe<br/>Deterioration<br/>n=5</b> | <b>Mild<br/>Deterioration<br/>n=37</b> | <b>P</b>    |
|-------------------------------------------|-----------------------------------------|----------------------------------------|-------------|
| WBC $>25 \times 10^9/L$ * (n, %)          | 5 (100.0)                               | 10 (27.0)                              | <b>0.00</b> |
| CRP $>8\text{mg/L}$ (n, %)                | 4 (80.0)                                | 10 (27.0)                              | <b>0.04</b> |
| Progressive decrease in platelets (n, %)  | 1 (20.0)                                | 3 (8.1)                                | 0.41        |
| Abnormal coagulation (n, %)               | 0 (00.0)                                | 7 (18.9)                               | 0.57        |
| Blood glucose $< 2.2\text{mmol/L}$ (n, %) | 1 (20.0)                                | 0 (0.0)                                | 0.12        |
| Albumin $<30\text{g/L}$ (n, %)            | 1 (20.0)                                | 14 (37.8)                              | 0.64        |
| Invasive respiratory support (n, %)       | 3 (60.0)                                | 23 (62.2)                              | $>0.99$     |
| Non-invasive respiratory support (n, %)   | 0 (0.0)                                 | 2 (5.4)                                | $>0.99$     |
| Pulmonary surfactant (n, %)               | 3 (60.0)                                | 26 (70.3)                              | $>0.99$     |
| Dopamine support (n, %)                   | 1 (20.0)                                | 19 (51.4)                              | 0.35        |
| Antibiotics (n, %)                        | 1 (20.0)                                | 10 (27.0)                              | $>0.99$     |
| Plasma transfusion (n, %)                 | 0 (0.0)                                 | 2 (5.4)                                | $>0.99$     |
| Intravenous immunoglobulin (n, %)         | 0 (0)                                   | 2 (5.4)                                | $>0.99$     |

\*Baseline values were tested before or within 24 hours of the initial PV-IVH diagnosis. PV-IVH: periventricular - intraventricular hemorrhage; WBC: white blood cell; CRP: C-reactive protein
